# Supplementary material for: Fabrication of Carbon Nanomaterials Using Laser Scribing on Copper Nanoparticles-Embedded Polyacrylonitrile Films and Their Application in a Gas Sensor
Source: Polymers (Basel). 2021 Apr 28;13(9):1423. doi: 10.3390/polym13091423 (PMC8124524; doi:10.3390/polym13091423)
Supplement: Supplementary file 1 [file polymers-13-01423-s001.zip › polymers-1178794 - Supplementary Material-done.pdf]

Supplementary Material

# Fabrication of carbon nanomaterials using laser scribing on copper nanoparticles-embedded polyacrylonitrile films and their application in a gas sensor

## Fabrication of Carbon Nanomaterials Using Laser Scribing on Copper Nanoparticles-Embedded Polyacrylonitrile Films and Their Application in a Gas Sensor

Yong-il Ko <sup>1</sup>, Min-Jae Kim <sup>1</sup>, Dong-Yun Lee <sup>1</sup>, Jungtae Nam <sup>1</sup>, A-Rang Jang <sup>2,3,\*</sup>, Jeong-O Lee <sup>3</sup> and Keun-Soo Kim <sup>1,\*</sup>

<sup>1</sup> Department of Physics and Graphene Research Institute, Sejong University, Seoul 05006, Korea; armist130@gmail.com (Y.-i.K.); mjkimphys@gmail.com (M.J.K.); geovi012@gmail.com (D.Y.L.); goodnjt@kist.re.kr (J.N.)

<sup>2</sup> Department of Electrical Engineering, Semyung University, Jecheon 27136, Korea

<sup>3</sup> Advanced Materials Division, Korea Research Institute of Chemical Technology (KRICT), Gajeong-ro 141, Daejeon 34114, Korea; jolee@kRICT.re.kr

\* Correspondence: arjang@semyung.ac.kr (A.-R.J.); kskim2676@sejong.ac.kr (K.S.K.); Tel.: +82-43-649-1303 (A.-R.J.); +82-2-3408-3316 (K.S.K.)

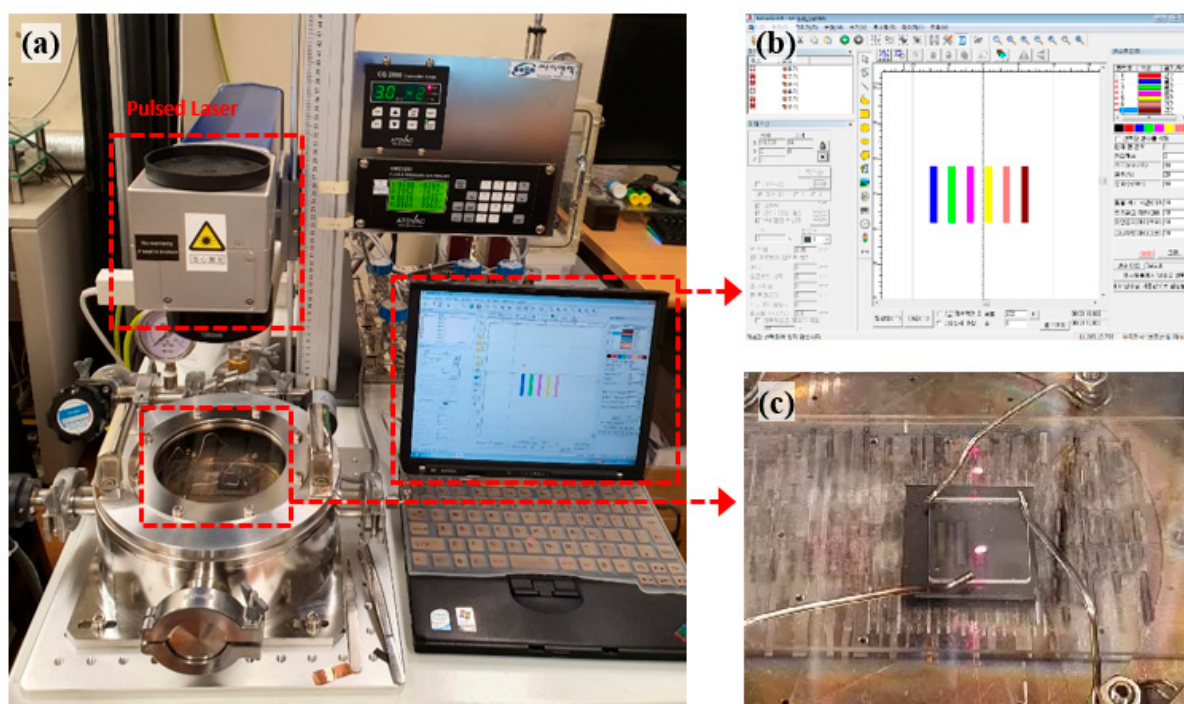

**Figure S1.** Photographs of (a) laser assisted CVD system, (b) operating software and (c) target sample in chamber (see the “Laser assisted CVD\_chamber.mp4” video file).

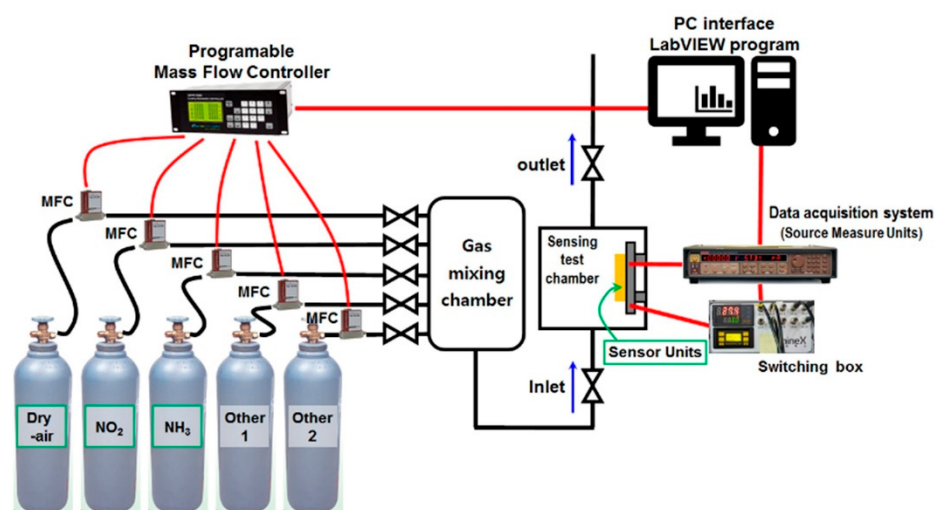

Figure S2. Schematic of the gas sensing system.

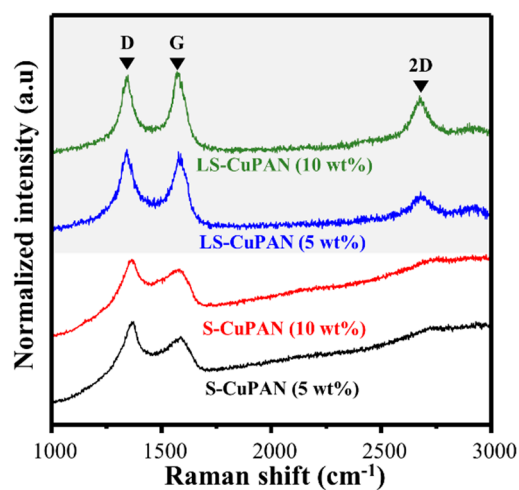

Figure S3. Raman spectra of S-CuPAN and LS-CuPAN with different weight ratios of Cu to PAN.

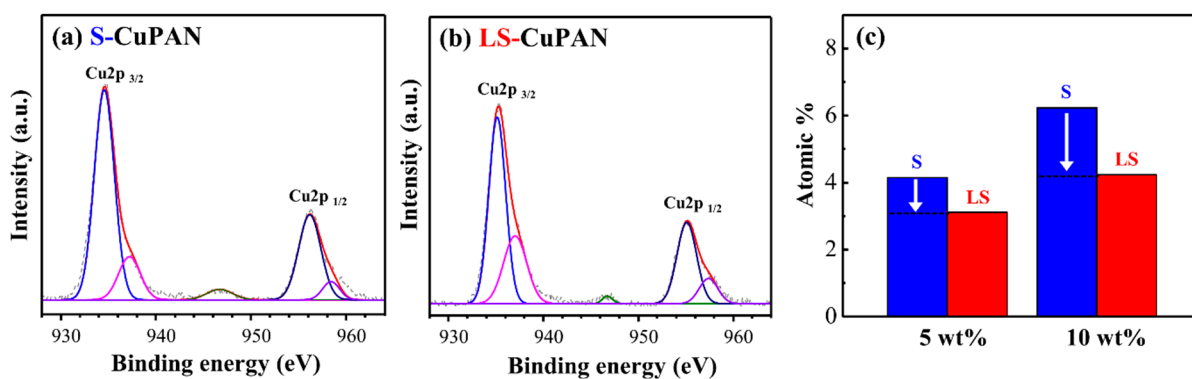

Figure S4. Cu2p spectra of (a) S-CuPAN (10 wt%), (b) LS-CuPAN (10 wt%), and (c) atomic ratio of Cu in XPS analysis.

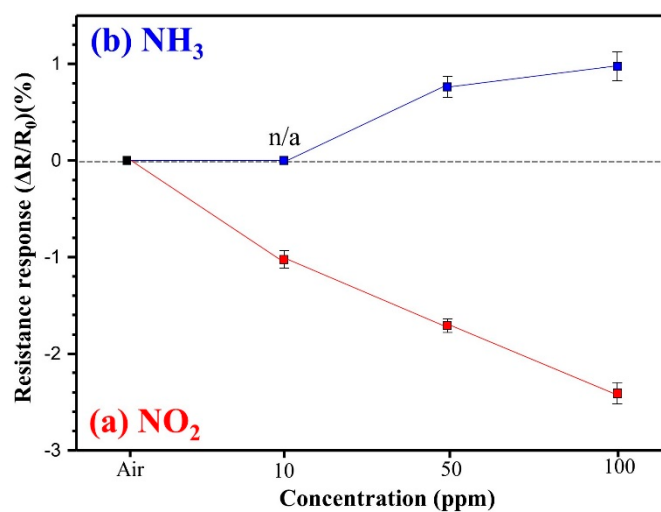

**Figure S5.** Resistance changing rates exposure to different gas concentrations, (a) under  $\text{NO}_2$  10, 50 and 100 ppm, (b) under  $\text{NH}_3$  10, 50 and 100 ppm.

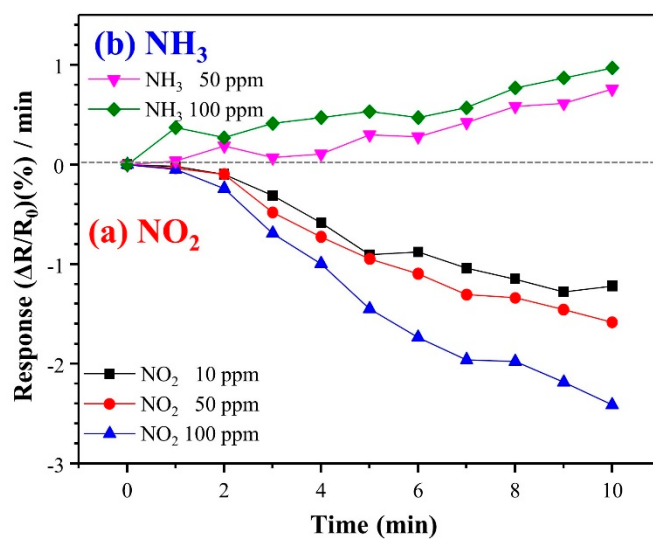

**Figure S6.** Resistance response versus time when (a)  $\text{NO}_2$  and (b)  $\text{NH}_3$  with different concentrations.
